## Extended dengue virus panel: application to antiviral compounds studies.

1

2

3

4 Franck Touret<sup>1\*</sup>, Cécile Baronti<sup>1</sup>, Xavier de Lamballerie<sup>1</sup> and Gilles Querat<sup>1</sup>

5 <sup>1</sup>: Unité des Virus Émergents (UVE : Aix-Marseille Univ – IRD 190 – Inserm 1207 – IHU  
6 Méditerranée Infection), Marseille, France

7 \*Corresponding author: [franck.touret@hotmail.fr](mailto:franck.touret@hotmail.fr)

8

### 9 **Abstract**

10 Dengue is the most widespread arboviral disease with approximately 1/3 of the world  
11 population at risk. Dengue viruses belong to the genus *Flavivirus* (*Flaviviridae* family) and  
12 are divided into four closely related serotypes (1-4) that share 60 to 75 % identity at the amino  
13 acid level. This viral diversity complicates the development of antivirals and currently they  
14 are still no approved treatment. With the aim of providing an efficient tool for dengue virus  
15 research particularly to evaluate compounds efficacy, we developed a panel of 19 dengue  
16 viruses covering nearly all genotypes in the four serotypes. After a phylogenetic analysis we  
17 selected relevant strains from our collection and design reverse genetic system based on the  
18 ISA technic to generate the missing ones. Finally, we evaluated our dengue panel against  
19 three, already published, compounds. We demonstrated that NITD008, which targeted the  
20 very conserved active site of the polymerase, exhibited very similar EC50s regardless of the  
21 dengue genotypes. But compounds targeting either directly or indirectly less conserved  
22 proteins such as the capsid (ST-148) or NS4B (SDM25N) exhibited large differences of  
23 activity toward the various genotypes of dengue viruses. These data reinforce our conviction  
24 that there is a real need to evaluate compounds activity against a large panel of dengue  
25 viruses.

### 26 **Article**

27 Dengue virus is a major threat to human health with approximately 1/3 of the world  
28 population at risk of being infected. Dengue virus is the causative agent of the dengue fever  
29 and the more severe Dengue Hemorrhagic Fever (DHF) <sup>1</sup> and Dengue Shock syndrome  
30 (DSS). It belongs to the genus *Flavivirus* (*Flaviviridae* family) which comprises other  
31 clinically important human pathogens such as Yellow fever virus, West Nile Virus and the  
32 recently emerging Zika Virus <sup>2</sup>. Dengue is an arthropod born virus transmitted by the bites of  
33 mosquitoes from the genus *Aedes* (*Stegomyia*). This virus has a transmission cycle that  
34 alternates between a sylvatic enzootic cycle using arboreal mosquitoes as vectors and an  
35 urban cycle which include humans using *Aedes aegypti* and *albopictus* mosquitoes <sup>3</sup>. Dengue

36 is a positive single strand RNA virus with a 10.7 kb genome coding for a single polyprotein  
37 which is processed in three structural proteins (C, PrM and ENV), and seven nonstructural  
38 proteins (NS1, NS2A, NS2B, NS3, NS4A, NS4B and NS5) <sup>4</sup>. Dengue is divided into four  
39 closely relative serotypes (1-4) that share 60 to 75 % identity at the amino acid level <sup>5</sup>. Inside  
40 this serotype classification, Dengue virus are also classified as genotypes with a variable  
41 terminology between authors <sup>6,7</sup>.

42 For researchers studying dengue virus, it can be really challenging to develop Direct Active  
43 Antivirals (DAA) against such a large viral diversity. Despite the huge effort to provide an  
44 antiviral therapy <sup>8-11</sup>, they are still no approved drugs. At this time treatments are only  
45 supportive <sup>12</sup>.

46 With the aim of providing an efficient tool for dengue virus research particularly to evaluated  
47 compounds efficacy, we developed a panel of dengue viruses covering near all genotypes in  
48 the four serotypes (figure 1). Whenever possible, we chosen to select strains that exhibited  
49 low passages in cell cultures and were issued from recent outbreaks. The *ad. hoc.* strains were  
50 selected from the European Virus Archive (EVA) collection <sup>13</sup>, the French National Reference  
51 center for arbovirus (CNR) and using our in house reverse genetic technic that allow us to  
52 generate infectious viruses from published full length genome sequences <sup>14,15</sup>.

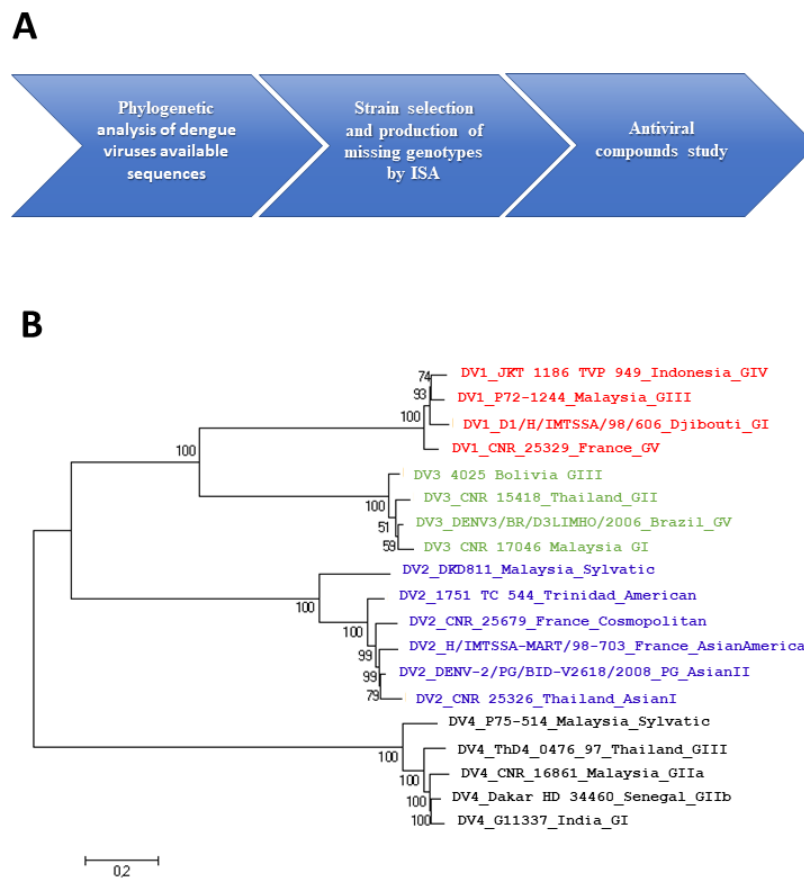

53

54 **Figure 1 : Dengue panel construction** A: Structure of the workflow used for the panel construction. B:  
55 phylogenetic tree of the panel using full nucleic acid coding sequence and the maximum likelihood method

56 (GTR+G+I model) with 500 bootstraps. Strains information: DENV-1: Genotype I: (Djibouti, AF298808,);  
57 Genotype III (Malaysia, EF457905.1); Genotype IV (Indonesia, EUO7031); Genotype V (France, MF004384);  
58 DENV-2: Genotype AsianAmerica (France Martinique, AF208496); Genotype American (Trinidad,  
59 EU073981.1); Genotype Cosmopolitan (France, GenBank MF004385,); Genotype Asian1 (Thailand,  
60 MH888331); Genotype Asian 2 (Papua New Guinea, FJ906959.1); Genotype Sylvatic (Malaysia, FJ467493.1);  
61 DENV-3: Genotype I (Malaysia, MF004386, Genotype II (Thailand, MH888332); Genotype III (Bolivia,  
62 MH888333 ); Genotype V (Brazil, JN697379.1); DENV-4 : Genotype IIb (Senegal, MF004387,); Genotype IIa  
63 (Malaysia, MH888334); Genotype III (Thailand, AY618988.1); Genotype Sylvatic (Malaysia, JF262779.1);  
64 Genotype I (INDIA, JF262783.1). Complete information relative to the strains of the panel are more fully  
65 detailed in the supplemental material.

66

67 For this purpose, we collected dengue complete genome sequences from the NCBI database  
68 and complemented this large database with those of our still unpublished “in house” and CNR  
69 strains. We performed phylogenetic reconstructions with the maximum likelihood method to  
70 assign all available genome sequences to a genotype in a serotype (reduced versions of  
71 phylogenetic trees are provided in Supplemental material fig 1,2,3 and 4). From this  
72 phylogenetic analysis, we noticed that six dengue genotypes were available only as complete  
73 genome sequences in the NCBI database but without biological strain counterparts (DENV-1  
74 genotype III, DENV-2 genotype sylvatic and Asian II, DENV-3 genotype V and DENV-4  
75 genotype III and sylvatic). To obtain these strains, we designed reverse genetics systems  
76 based on ISA technic and generated synthetics overlapping DNA fragments that cover each of  
77 the whole genome, bordered by a CMV promoter on the 5’ end and a Ribozyme and poly-  
78 adenylation signal on the 3’ end. The overlapping fragments were co-transfected in  
79 permissible cell lines and allowed us to recover the missing biological strains to complete our  
80 panel. The viral stocks were grown on Vero E6 cells and were fully sequenced. All these  
81 dengue strains have been made available through the EVA collection.

82 Various specific dengue inhibitors that targeted several viral proteins involved in different  
83 replication steps have been developed. ST-148, an inhibitor targeting the capsid structural  
84 protein, has been reported to inhibit all dengue serotypes in cultures, although with varying  
85 efficiency, and seems promising in AG-129 mouse model infected with a Dengue 2 strain <sup>16</sup>.  
86 NITD008, a adenosine analog inhibitor that target the RNA-dependent RNA polymerase  
87 activity was shown to be efficient against all dengue serotypes as well as other flaviviruses <sup>11</sup>.  
88 SDM25N a  $\delta$  opioid receptor antagonist has been reported to target, probably indirectly, the  
89 NS4 B protein. So far it has only been shown to be active against a dengue 2 strain <sup>10</sup>.  
90 Depending on the target and its sequence variability and the various mechanisms of action of  
91 these compounds their efficiency is likely to differ a lot regarding all the genotypes of dengue  
92 viruses. To evaluate our reference dengue panel, we assess the antiviral activity of these three  
93 compounds using a single common protocol based on a viral RNA yield reduction assay that  
94 do not depend on the cytopathogenic potential of the strain and allow the inclusion of any  
95 dengue strain in the panel. The compounds were assayed from 10 to 0.005 $\mu$ M with 3-fold  
96 step-dilution in triplicates and the amounts of viral RNA in the supernatant during the log-  
97 growth curve was quantified by qRT-PCR so as to determine the EC50 (table1).

98  
99  
100

**Table 1: Dengue panel susceptibility to three antiviral compounds assessed by yield reduction assay.** Anti-capsid ST-148, nucleoside analog NITD008 and anti-NS4B SDM25N were tested against the dengue panel from 10 $\mu$ M to 0.005 $\mu$ M. AA: Asian American, A: American, C: cosmopolitan.

|                 | Virus                                               | Genotype        | ST-148          | NITD008         | SDM25N          |
|-----------------|-----------------------------------------------------|-----------------|-----------------|-----------------|-----------------|
|                 |                                                     |                 | EC50 ( $\mu$ M) | EC50 ( $\mu$ M) | EC50 ( $\mu$ M) |
| <b>Dengue 1</b> | D1/H/IMTSSA/98/606<br><b>Djibouti</b>               | <b>I</b>        | >10             | 0,9 $\pm$ 0,1   | >10             |
|                 | JKT 1186 TVP 949<br><b>Indonesia</b>                | <b>IV</b>       | >10             | 0,3 $\pm$ 0,03  | 5,5 $\pm$ 3,67  |
|                 | CNR_25329<br><b>France</b>                          | <b>V</b>        | >10             | 2,7 $\pm$ 4     | 7,4 $\pm$ 0,04  |
|                 | P72-1244<br><b>Malaysia</b>                         | <b>III</b>      | 3 $\pm$ 0,5     | 0,9 $\pm$ 0,2   | >10             |
| <b>Dengue 2</b> | H/IMTSSA-MART/98-703<br><b>France</b>               | <b>AA</b>       | 0,8 $\pm$ 0,5   | 0,9 $\pm$ 0,3   | 2,9 $\pm$ 0,95  |
|                 | _1751 TC 544<br><b>Trinidad</b>                     | <b>A</b>        | 1 $\pm$ 0,7     | 0,3 $\pm$ 0,06  | 2,9 $\pm$ 0,01  |
|                 | CNR_25679<br><b>France</b>                          | <b>C</b>        | 1,1 $\pm$ 0,3   | 0,2 $\pm$ 0,07  | 1,9 $\pm$ 0,03  |
|                 | CNR 25326<br><b>Thailand</b>                        | <b>AsianI</b>   | 0,1 $\pm$ 0,03  | 0,9 $\pm$ 0,2   | 7,7 $\pm$ 0,04  |
|                 | DENV-2/PG/BID-V2618/2008<br><b>Papua New Guinea</b> | <b>Asian II</b> | 0,2 $\pm$ 0,16  | 0,3 $\pm$ 0,5   | 4,1 $\pm$ 0,02  |
|                 | DKD811<br><b>Malaysia</b>                           | <b>Sylvatic</b> | 0,4 $\pm$ 0,18  | 0,4 $\pm$ 0,1   | >10             |
| <b>Dengue 3</b> | DENV3/BR/D3LIMHO/2006<br><b>Brazil</b>              | <b>V</b>        | >10             | 1 $\pm$ 0,09    | >10             |
|                 | 4025<br><b>Bolivia</b>                              | <b>III</b>      | >10             | 1 $\pm$ 0,05    | >10             |
|                 | CNR 17046<br><b>Malaysia</b>                        | <b>I</b>        | >10             | 2,8 $\pm$ 0,3   | >10             |
|                 | CNR 15418<br><b>Thailand</b>                        | <b>II</b>       | >10             | 1,2 $\pm$ 0,3   | >10             |
| <b>Dengue 4</b> | G11337<br><b>India</b>                              | <b>I</b>        | >10             | 1,2 $\pm$ 0,03  | >10             |
|                 | Dakar HD 34460<br><b>Senegal</b>                    | <b>IIb</b>      | >10             | 0,9 $\pm$ 0,3   | >10             |
|                 | CNR_16861<br><b>Malaysia</b>                        | <b>IIa</b>      | >10             | 0,4 $\pm$ 0,01  | >10             |
|                 | ThD4_0476_97<br><b>Thailand</b>                     | <b>III</b>      | 0,3 $\pm$ 0,08  | 0,2 $\pm$ 0,08  | >10             |
|                 | P75-514<br><b>Malaysia</b>                          | <b>Sylvatic</b> | >10             | 1 $\pm$ 0,05    | >10             |

101

102 For NITD008 we measured EC50 ranging from 0.2 $\mu$ M to 2.8 $\mu$ M in accordance to previously  
103 described activity of the compound against different serotypes<sup>17</sup>. All dengue strains in the  
104 panel were somewhat similarly sensitive to NITD008, which is fully consistent with the  
105 flaviviral broad spectrum activity of this nucleoside analog.

106 Concerning the capsid inhibitor ST-148, all genotypes of dengue 2 strains were sensitive with  
107 EC50 ranging from 0.25 to 1.1 $\mu$ M. However, we found only one sensitive genotype for  
108 DENV-1 (DENV-1 GIII at 0.5 $\mu$ M) as the EC50 of the other dengue 1 genotypes were all  
109 above 10 $\mu$ M. Similarly, only one DENV-4 genotype was sensitive to the compound: (DENV-  
110 4 GIII at 0.3 $\mu$ M), the EC50s of the others were above 10 $\mu$ M. Lastly, all DENV3 genotypes  
111 were resistant to the capsid inhibitor, with EC50 > 10 $\mu$ M. Although Byrd and co-workers  
112 found that DENV-2 serotype was the most sensible serotype to this capsid inhibitor and

113 showed some variability in the inhibition, they could not fully assess the poor and highly  
114 variable susceptibility of strains from other serotypes.

115 For SDM25N, most of the dengue 2 genotypes and half of dengue 1 genotypes were  
116 moderately sensitive to the compound with EC50 ranging from around 2 to 8  $\mu$ M and all  
117 dengue 3 and 4 genotypes were less sensitive with EC50 above 10  $\mu$ M.

118 Overall, these results showed that compounds, like NITD008, that targeted very conserved  
119 sites such as the active site of the polymerase exhibited very similar EC50s regardless of the  
120 dengue genotypes but compounds targeting either directly or indirectly less conserved  
121 proteins such as the capsid or NS4B exhibited large differences of activity toward the various  
122 genotypes of dengue viruses. These data reinforce our conviction that there is a real need to  
123 evaluate compounds activity against a larger panel of clinically relevant dengue viruses such  
124 as our reference panel of near all available dengue genotypes.

### 125 **Acknowledgments**

126 We would thank the Dr Robert Tesh from the UTMB for providing us the Dengue 4 Genotype  
127 I strain G11337 from India. We also like to thank the Dr Stéphane Priet for his careful reading  
128 of the manuscript. As well as Magali Gilles, Fiona Baudino and Raphaelle Klitting from the  
129 UMR UVE (Marseille, France) for excellent technical help. We also thank Geraldine  
130 Piorkowski and Karine Barthelemy from the UMR UVE (Marseille, France) for the  
131 sequencing. This work was supported by the research Agreement ICD#1041950 between  
132 JANSSEN and the UMR UVE (Marseille, France).

### 133 **Contributions**

134 FT, XDL and GQ conceived the experiments. XDL allowed the funding of this study. FT, CB,  
135 and GQ performed the experiments. FT and GQ analyzed the results. FT and GQ wrote the  
136 paper. FT, CB, GQ and XDL reviewed and edited the paper.

137

138 **Bibliography**

- 139 1. Messina, J. P. *et al.* Global spread of dengue virus types: mapping the 70 year history.  
140 *Trends Microbiol.* **22**, 138–146 (2014).
- 141 2. Vasilakis, N. & Weaver, S. C. Flavivirus transmission focusing on Zika. *Curr. Opin.*  
142 *Virol.* **22**, 30–35 (2017).
- 143 3. Chen, R. & Vasilakis, N. Dengue — Quo tu et quo vadis? *Viruses* **3**, 1562–1608 (2011).
- 144 4. Gebhard, L. G., Filomatori, C. V. & Gamarnik, A. V. Functional RNA Elements in the  
145 Dengue Virus Genome. *Viruses* **3**, 1739–1756 (2011).
- 146 5. Guzman, M. G. & Harris, E. Dengue. *The Lancet* **385**, 453–465 (2015).
- 147 6. Carrillo-Valenzo, E. *et al.* Evolution of dengue virus in Mexico is characterized by  
148 frequent lineage replacement. *Arch. Virol.* **155**, 1401–1412 (2010).
- 149 7. Weaver, S. C. & Vasilakis, N. Molecular evolution of dengue viruses: Contributions of  
150 phylogenetics to understanding the history and epidemiology of the preeminent arboviral  
151 disease. *Infect. Genet. Evol.* **9**, 523–540 (2009).
- 152 8. Canard, B. Antiviral research and development against dengue virus. *Available Accessed*  
153 **9**, (2012).
- 154 9. Coutard, B. *et al.* The VIZIER project: Preparedness against pathogenic RNA viruses.  
155 *Antiviral Res.* **78**, 37–46 (2008).
- 156 10. van Cleef, K. W. R. *et al.* Identification of a new dengue virus inhibitor that targets the  
157 viral NS4B protein and restricts genomic RNA replication. *Antiviral Res.* **99**, 165–171  
158 (2013).
- 159 11. Yin, Z. *et al.* An adenosine nucleoside inhibitor of dengue virus. *Proc. Natl. Acad. Sci. U.*  
160 *S. A.* **106**, 20435–20439 (2009).
- 161 12. Kaptein, S. J. & Neyts, J. Towards antiviral therapies for treating dengue virus infections.  
162 *Curr. Opin. Pharmacol.* **30**, 1–7 (2016).

- 163 13. Romette, J. L. *et al.* The European Virus Archive goes global: A growing resource for  
164 research. *Antiviral Res.* (2018). doi:10.1016/j.antiviral.2018.07.017
- 165 14. Aubry, F. *et al.* Single-stranded positive-sense RNA viruses generated in days using  
166 infectious subgenomic amplicons. *J. Gen. Virol.* **95**, 2462–2467 (2014).
- 167 15. Aubry, F. *et al.* ‘ISA-Lation’ of Single-Stranded Positive-Sense RNA Viruses from Non-  
168 Infectious Clinical/Animal Samples. *PloS One* **10**, e0138703 (2015).
- 169 16. Byrd, C. M. *et al.* A Novel Inhibitor of Dengue Virus Replication That Targets the Capsid  
170 Protein. *Antimicrob. Agents Chemother.* **57**, 15–25 (2013).
- 171 17. Xie, X., Zou, J., Wang, Q.-Y. & Shi, P.-Y. Targeting dengue virus NS4B protein for drug  
172 discovery. *Antiviral Res.* **118**, 39–45 (2015).

173

174

175
